# Supplementary material for: Significance of crystal habit sphericity in the determination of the impact sensitivity of bistetrazole-based energetic salts
Source: Royal Society of Chemistry journal article supplement (doi:10.1039/c8ce01117f), 2018-01-01
Supplement: c8ce01117f1.pdf [file c8ce01117f1.pdf]

# Significance of crystal habit sphericity in determination of impact sensitivity of bistetrazole-based energetic salts

**Sergey V. Bondarchuk**

---

*Department of Chemistry and Nanomaterials Science,  
Bogdan Khmelnytsky Cherkasy National University,  
blvd. Shevchenko 81, 18031 Cherkasy, Ukraine.  
Fax: (+3) 80472 37-21-42; Tel: (+3) 80472 37-65-76;*

*E-mail: [bondchem@cdu.edu.ua](mailto:bondchem@cdu.edu.ua)*

## SUPPORTING INFORMATION

*CrystEngComm*

## LIST OF SUPPLEMENTARY FIGURES AND TABLES:

|                                                                                                                                                                                         |     |
|-----------------------------------------------------------------------------------------------------------------------------------------------------------------------------------------|-----|
| <b>Fig. S1.</b> Crystal packing of the studied energetic salts.....                                                                                                                     | S3  |
| <b>Table S1.</b> The calculated and experimental (in parentheses) asymmetric cell parameters of the studied energetic salts.....                                                        | S4  |
| <b>Table S2.</b> The asymmetric cell volumes, relative errors of their estimation, experimental friction sensitivity, energies of the frontier crystal orbitals and oxygen balance..... | S5  |
| <b>Fig. S2.</b> The predicted crystal habits of salts <b>2-20</b> .....                                                                                                                 | S6  |
| <b>Table S3.</b> The selected crystal habit properties for salts <b>2-20</b> .....                                                                                                      | S7  |
| <b>Table S4.</b> Decomposition schemes for the studied energetic salts according to the H <sub>2</sub> O–CO <sub>2</sub> arbitrary.....                                                 | S9  |
| <b>Fig. S3.</b> Separate correlation of decomposition temperature (a), crystal habit sphericity (b) with impact sensitivity and function $\Omega$ with friction sensitivity (c).....    | S10 |

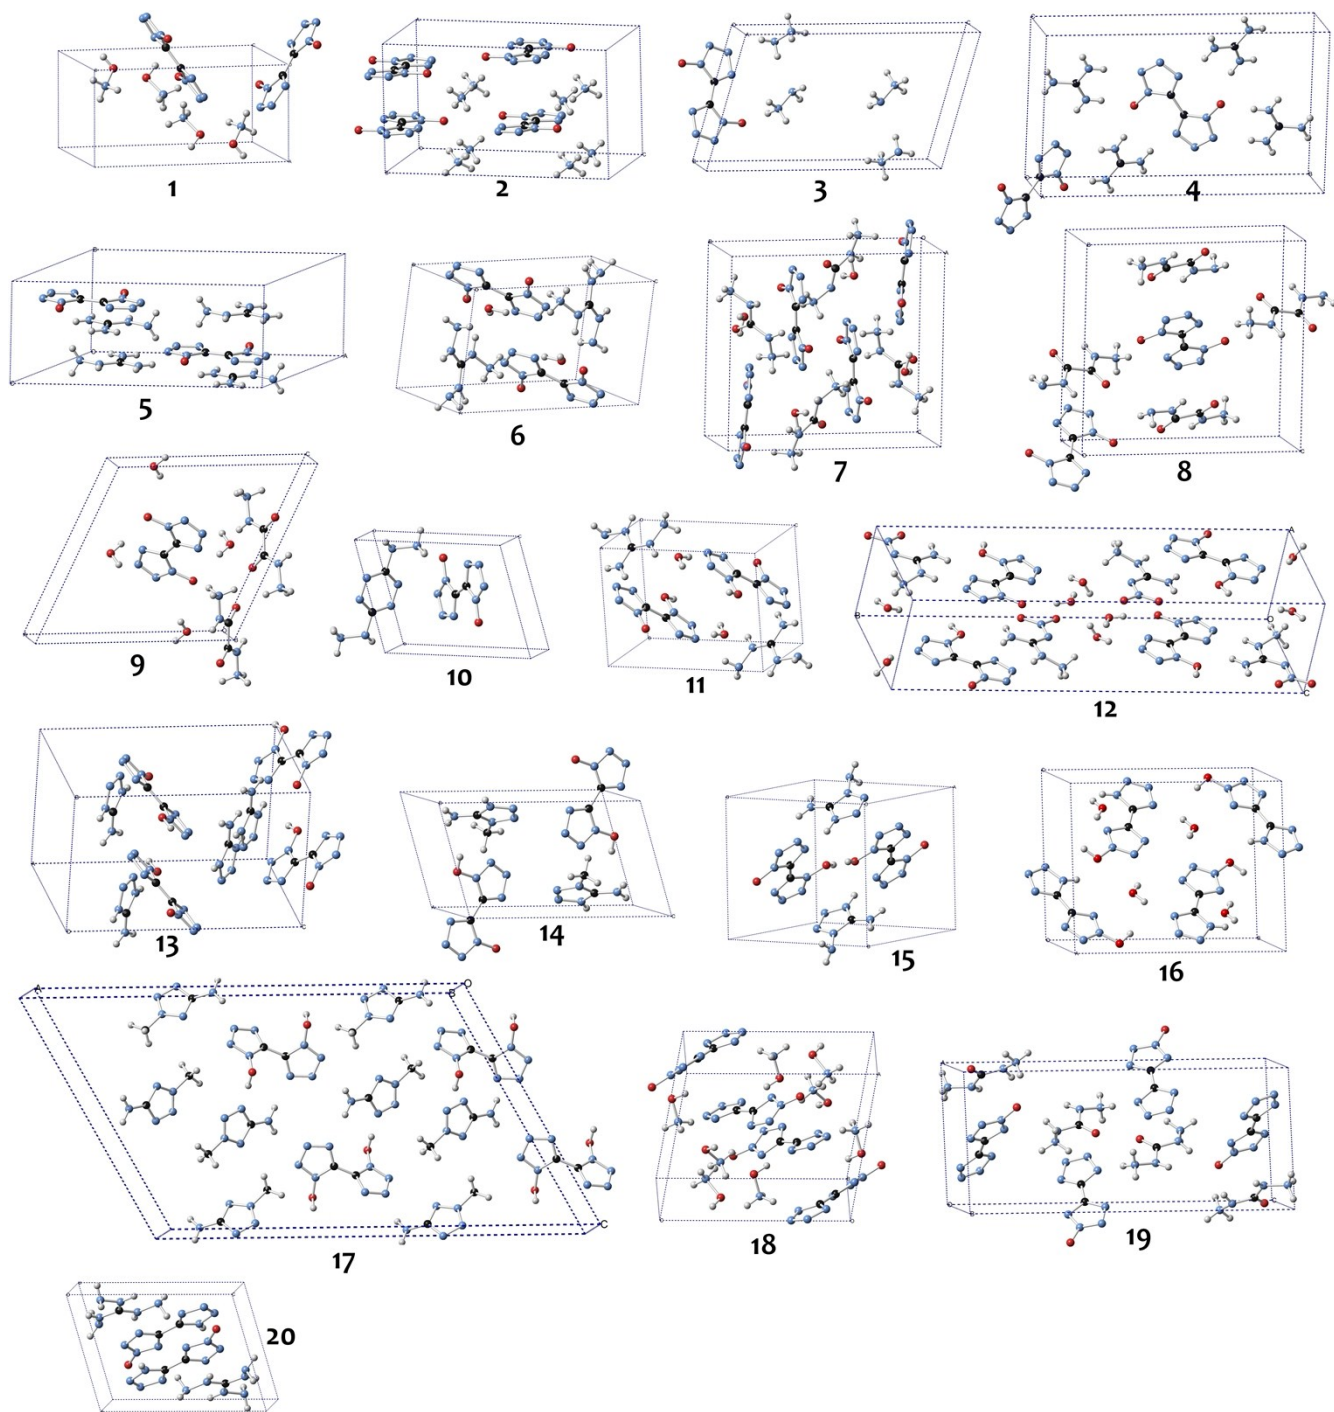

**Fig. S1.** Crystal packing of the studied energetic salts.

**Table S1. The calculated and experimental (in parentheses) asymmetric cell parameters of the studied energetic salts.**

| Salt      | Space group | $a$ (Å)            | $b$ (Å)             | $c$ (Å)             | $\alpha$ (°)       | $\beta$ (°)        | $\gamma$ (°)       | Ref  |
|-----------|-------------|--------------------|---------------------|---------------------|--------------------|--------------------|--------------------|------|
| <b>1</b>  | $P2_1/c$    | 5.527<br>(5.426)   | 11.523<br>(11.660)  | 6.480<br>(6.501)    |                    | 96.10<br>(95.26)   |                    | [24] |
| <b>2</b>  | $I222$      | 7.001<br>(7.527)   | 8.850<br>(7.531)    | 12.684<br>(13.291)  |                    |                    |                    | [39] |
| <b>3</b>  | $P\bar{1}$  | 3.601<br>(3.660)   | 8.696<br>(8.670)    | 14.810<br>(14.711)  | 101.60<br>(101.10) | 94.80<br>(94.95)   | 97.35<br>(97.74)   | [39] |
| <b>4</b>  | $P2_1/c$    | 3.567<br>(3.605)   | 17.211<br>(17.123)  | 9.532<br>(9.548)    |                    | 98.52<br>(97.73)   |                    | [39] |
| <b>5</b>  | $C2/m$      | 15.007<br>(14.724) | 6.047<br>(6.182)    | 8.517<br>(8.702)    |                    | 121.72<br>(123.28) |                    | [39] |
| <b>6</b>  | $P\bar{1}$  | 7.050<br>(7.117)   | 8.087<br>(8.090)    | 10.629<br>(10.544)  | 100.15<br>(100.36) | 101.60<br>(102.07) | 105.31<br>(105.13) | [39] |
| <b>7</b>  | $P2_1/c$    | 7.027<br>(6.994)   | 12.764<br>(12.7121) | 11.636<br>(11.5676) |                    | 94.40<br>(93.51)   |                    | [39] |
| <b>8</b>  | $P2_1/c$    | 4.554<br>(4.554)   | 12.302<br>(12.424)  | 12.964<br>(12.943)  |                    | 93.64<br>(93.77)   |                    | [39] |
| <b>9</b>  | $P2_1/c$    | 11.439<br>(11.712) | 4.781<br>(4.760)    | 11.320<br>(11.367)  |                    | 113.66<br>(115.65) |                    | [39] |
| <b>10</b> | $P\bar{1}$  | 4.824<br>(4.845)   | 6.794<br>(6.786)    | 9.465<br>(9.392)    | 75.69<br>(75.12)   | 76.37<br>(76.63)   | 89.00<br>(88.73)   | [39] |
| <b>11</b> | $P\bar{1}$  | 7.424<br>(7.405)   | 7.875<br>(7.926)    | 9.550<br>(9.475)    | 93.931<br>(93.64)  | 90.18<br>(90.44)   | 106.50<br>(106.27) | [39] |
| <b>12</b> | $P2_1/n$    | 6.224<br>(6.275)   | 26.243<br>(26.188)  | 7.465<br>(7.408)    |                    | 93.94<br>(93.55)   |                    | [39] |
| <b>13</b> | $C2/c$      | 7.446<br>(7.425)   | 9.197<br>(9.175)    | 13.760<br>(13.687)  |                    | 99.12<br>(98.79)   |                    | [39] |
| <b>14</b> | $P\bar{1}$  | 6.282<br>(6.291)   | 7.409<br>(7.396)    | 11.858<br>(11.878)  | 106.79<br>(107.43) | 99.98<br>(99.93)   | 98.77<br>(98.49)   | [39] |
| <b>15</b> | $P\bar{1}$  | 7.519<br>(7.449)   | 8.576<br>(8.402)    | 8.497<br>(8.651)    | 93.03<br>(91.72)   | 114.52<br>(114.59) | 92.70<br>(92.70)   | [39] |
| <b>16</b> | $C2/c$      | 27.212<br>(27.041) | 3.737<br>(3.763)    | 16.766<br>(16.874)  |                    | 117.49<br>(117.62) |                    | [39] |
| <b>17</b> | $P2_1/c$    | 4.911<br>(4.900)   | 13.067<br>(13.081)  | 9.964<br>(9.893)    |                    | 102.27<br>(102.07) |                    | [40] |
| <b>18</b> | $P2_1/n$    | 9.137<br>(9.046)   | 8.485<br>(8.459)    | 11.046<br>(11.096)  |                    | 99.39<br>(99.37)   |                    | [40] |
| <b>19</b> | $P2_1/n$    | 8.347<br>(8.438)   | 5.543<br>(5.440)    | 19.805<br>(19.786)  |                    | 92.86<br>(93.38)   |                    | [40] |
| <b>20</b> | $P\bar{1}$  | 7.293<br>(7.322)   | 7.426<br>(7.363)    | 9.850<br>(9.819)    | 84.59<br>(85.38)   | 75.04<br>(74.16)   | 84.81<br>(84.56)   | [40] |

**Table S2. The asymmetric cell volumes, relative errors of their estimation, experimental friction sensitivity, energies of the frontier crystal orbitals and oxygen balance.**

| Salt | $V_{exper}$ ( $\text{\AA}^3$ ) | $V_{calcd}$ ( $\text{\AA}^3$ ) | $\delta$ (%) | $FS$ (N)         | $E_{HOCO}$ (eV) | $E_{LUCO}$ (eV) | OB (%) |
|------|--------------------------------|--------------------------------|--------------|------------------|-----------------|-----------------|--------|
| 1    | 410.36                         | 409.57                         | 0.85         | 120 <sup>a</sup> | -6.200          | -2.602          | -27.1  |
| 2    | 785.53                         | 753.41                         | 0.61         | 360 <sup>b</sup> | -5.848          | -2.742          | -47.0  |
| 3    | 447.78                         | 450.88                         | -0.10        | 252 <sup>b</sup> | -5.387          | -2.573          | -47.8  |
| 4    | 579.06                         | 584.03                         | -1.42        | 360 <sup>b</sup> | -5.653          | -2.22           | -66.6  |
| 5    | 658.15                         | 662.2                          | 0.94         | 324 <sup>b</sup> | -5.703          | -2.404          | -65.4  |
| 6    | 555.7                          | 555.15                         | 0.75         | 120 <sup>b</sup> | -5.935          | -2.769          | -49.3  |
| 7    | 1041.07                        | 1026.53                        | -0.50        | 240 <sup>b</sup> | -6.088          | -2.767          | -40.3  |
| 8    | 723.84                         | 730.72                         | -0.26        | 360 <sup>b</sup> | -6.145          | -3.171          | -51.2  |
| 9    | 566.99                         | 571.26                         | -0.11        | 288 <sup>b</sup> | -6.062          | -3.159          | -41.8  |
| 10   | 291.58                         | 290.12                         | -1.05        | 80 <sup>b</sup>  | -5.699          | -4.269          | -51.2  |
| 11   | 533.99                         | 532.58                         | -0.13        | 168 <sup>b</sup> | -6.317          | -3.025          | -49.1  |
| 12   | 1216.32                        | 1215.02                        | -1.18        | 192 <sup>b</sup> | -6.212          | -3.214          | -27.1  |
| 13   | 931.19                         | 921.47                         | 0.49         | 72 <sup>b</sup>  | -6.118          | -2.916          | -40.8  |
| 14   | 508.25                         | 507.59                         | -0.72        | 240 <sup>b</sup> | -6.192          | -3.010          | -56.5  |
| 15   | 496.85                         | 491.06                         | -0.98        | 160 <sup>b</sup> | -6.054          | -2.859          | -41.5  |
| 16   | 1513.94                        | 1521.38                        | -0.95        | 360 <sup>b</sup> | -6.098          | -2.678          | -117.9 |
| 17   | 624.57                         | 620.1                          | -1.14        | 30 <sup>c</sup>  | -6.658          | -2.988          | -37.2  |
| 18   | 845.98                         | 837.74                         | 0.85         | 160 <sup>c</sup> | -6.086          | -2.384          | -36.3  |
| 19   | 915.25                         | 906.65                         | 0.61         | 240 <sup>c</sup> | -5.995          | -2.293          | -52.4  |
| 20   | 511.92                         | 506.13                         | -0.10        | 240 <sup>c</sup> | -6.088          | -2.954          | -62.0  |

<sup>a</sup> Ref. 24, <sup>b</sup> Ref. 39, <sup>c</sup> Ref. 40.

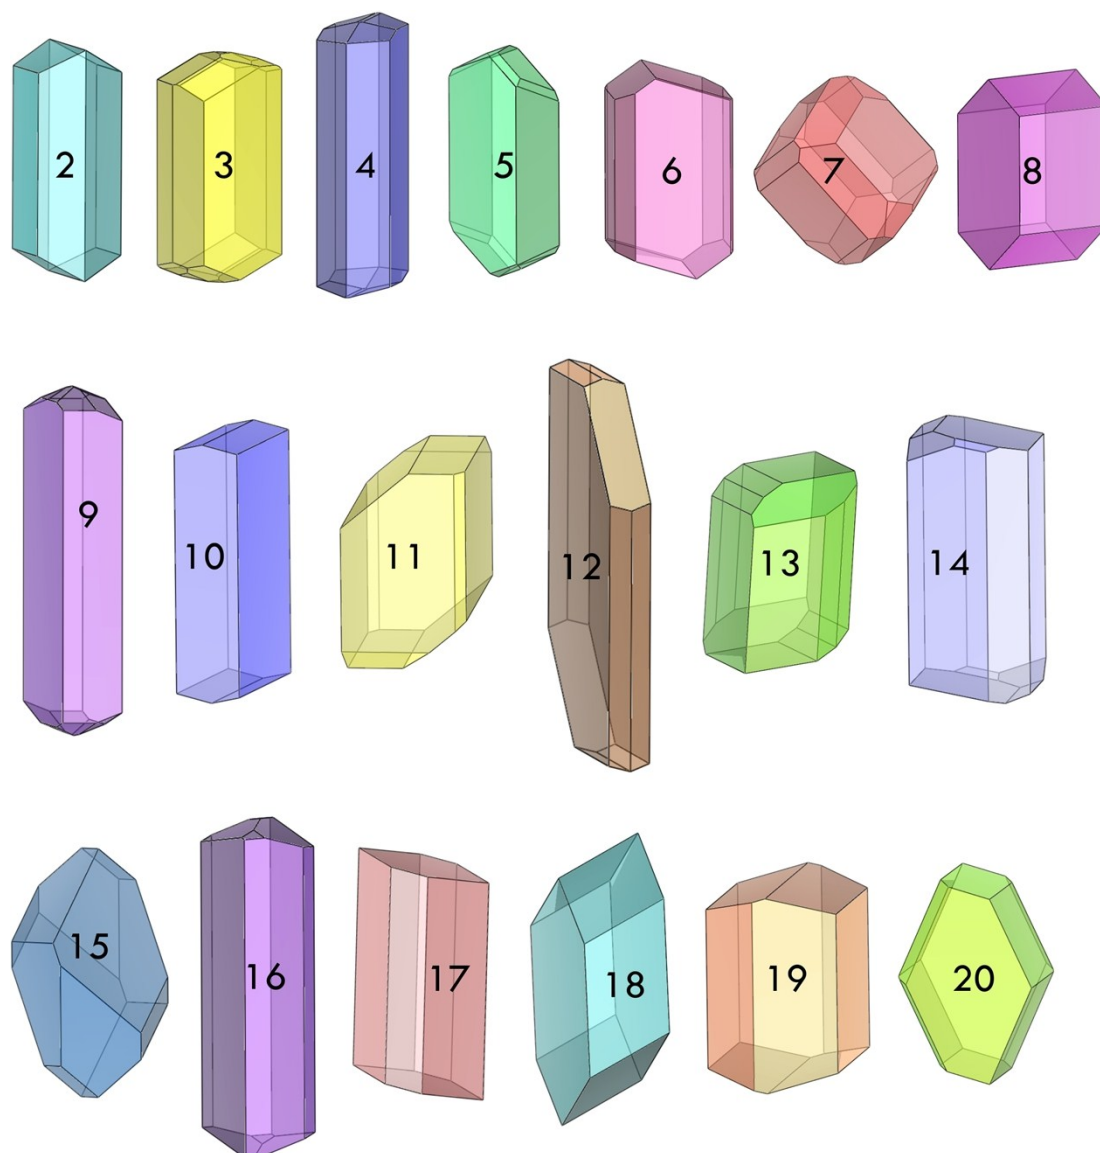

**Fig. S2.** The predicted crystal habits of salts 2-20.

**Table S3. The selected crystal habit properties for salts 2-20.**

| <b>Salt 2</b> | <i>(hkl)</i> | Multiplicity | $E_{att}$ (kJ mol <sup>-1</sup> ) | $R_{hkl}$ | $S_{rel}$ (%) |
|---------------|--------------|--------------|-----------------------------------|-----------|---------------|
|               | (0 0 2)      | 2            | -21.18                            | 1.00      | 37.19         |
|               | (0 1 1)      | 4            | -33.70                            | 1.59      | 38.37         |
|               | (1 0 1)      | 4            | -49.92                            | 2.36      | 24.44         |
| <b>Salt 3</b> | <i>(hkl)</i> | Multiplicity | $E_{att}$ (kJ mol <sup>-1</sup> ) | $R_{hkl}$ | $S_{rel}$ (%) |
|               | (0 0 1)      | 2            | -17.84                            | 1.00      | 47.30         |
|               | (0 1 0)      | 2            | -30.13                            | 1.69      | 16.26         |
|               | (0 1 -1)     | 2            | -28.79                            | 1.61      | 16.12         |
|               | (1 0 0)      | 2            | -60.64                            | 3.40      | 2.41          |
|               | (1 0 -1)     | 2            | -61.01                            | 3.42      | 0.25          |
|               | (1 -1 -1)    | 2            | -57.60                            | 3.23      | 5.66          |
|               | (1 -1 1)     | 2            | -57.88                            | 3.24      | 0.54          |
|               | (1 -1 -2)    | 2            | -57.34                            | 3.21      | 0.14          |
|               | (1 1 -1)     | 2            | -59.68                            | 3.35      | 0.23          |
|               | (1 -1 2)     | 2            | -54.16                            | 3.04      | 4.70          |
|               | (1 1 -2)     | 2            | -56.21                            | 3.15      | 0.86          |
|               | (1 1 -3)     | 2            | -52.87                            | 2.96      | 3.65          |
|               | (1 2 -2)     | 2            | -53.69                            | 3.01      | 1.89          |
| <b>Salt 4</b> | <i>(hkl)</i> | Multiplicity | $E_{att}$ (kJ mol <sup>-1</sup> ) | $R_{hkl}$ | $S_{rel}$ (%) |
|               | (0 2 0)      | 2            | -35.43                            | 1.00      | 33.33         |
|               | (0 1 1)      | 4            | -39.96                            | 1.13      | 51.57         |
|               | (1 0 0)      | 2            | -122.61                           | 3.46      | 0.82          |
|               | (1 1 0)      | 4            | -120.59                           | 3.40      | 7.94          |
|               | (1 1 1)      | 4            | -111.06                           | 3.13      | 6.34          |
| <b>Salt 5</b> | <i>(hkl)</i> | Multiplicity | $E_{att}$ (kJ mol <sup>-1</sup> ) | $R_{hkl}$ | $S_{rel}$ (%) |
|               | (0 0 1)      | 2            | -44.81                            | 2.96      | 18.71         |
|               | (2 0 -1)     | 2            | -15.13                            | 1.00      | 65.14         |
|               | (1 1 0)      | 4            | -75.79                            | 5.01      | 11.52         |
|               | (1 1 -1)     | 4            | -75.79                            | 5.01      | 2.42          |
|               | (1 1 1)      | 4            | -75.79                            | 5.01      | 2.21          |
| <b>Salt 6</b> | <i>(hkl)</i> | Multiplicity | $E_{att}$ (kJ mol <sup>-1</sup> ) | $R_{hkl}$ | $S_{rel}$ (%) |
|               | (0 0 1)      | 2            | -13.77                            | 1.00      | 45.57         |
|               | (0 1 0)      | 2            | -22.65                            | 1.64      | 17.82         |
|               | (0 1 -1)     | 2            | -24.43                            | 1.77      | 9.87          |
|               | (1 0 0)      | 2            | -32.53                            | 2.36      | 15.56         |
|               | (1 -1 0)     | 2            | -35.68                            | 2.59      | 8.19          |
|               | (0 1 1)      | 2            | -22.76                            | 1.65      | 2.48          |
|               | (1 0 1)      | 2            | -30.75                            | 2.23      | 0.52          |
| <b>Salt 7</b> | <i>(hkl)</i> | Multiplicity | $E_{att}$ (kJ mol <sup>-1</sup> ) | $R_{hkl}$ | $S_{rel}$ (%) |
|               | (0 1 1)      | 4            | -38.45                            | 1.43      | 36.07         |
|               | (1 0 0)      | 2            | -26.97                            | 1.00      | 26.05         |
|               | (0 2 0)      | 2            | -49.35                            | 1.83      | 3.94          |
|               | (1 1 0)      | 4            | -39.02                            | 1.45      | 4.71          |
|               | (0 0 2)      | 2            | -45.90                            | 1.70      | 4.58          |
|               | (1 1 -1)     | 4            | -34.85                            | 1.29      | 22.15         |
|               | (1 1 1)      | 4            | -42.58                            | 1.58      | 2.37          |
|               | (1 0 2)      | 2            | -50.21                            | 1.86      | 0.14          |
| <b>Salt 8</b> | <i>(hkl)</i> | Multiplicity | $E_{att}$ (kJ mol <sup>-1</sup> ) | $R_{hkl}$ | $S_{rel}$ (%) |
|               | (0 1 1)      | 4            | -28.68                            | 1.85      | 35.76         |
|               | (0 0 2)      | 2            | -15.52                            | 1.00      | 41.30         |
|               | (1 0 0)      | 2            | -36.34                            | 2.34      | 22.93         |

Table S3. Continued.

| Salt 9  | (hkl)     | Multiplicity | $E_{\text{att}}$ (kJ mol <sup>-1</sup> ) | $R_{hkl}$ | $S_{\text{rel}}$ (%) |
|---------|-----------|--------------|------------------------------------------|-----------|----------------------|
|         | (1 0 0)   | 2            | -11.81                                   | 1.00      | 55.41                |
|         | (0 0 2)   | 2            | -18.48                                   | 1.56      | 34.44                |
|         | (1 1 0)   | 4            | -71.48                                   | 6.05      | 2.43                 |
|         | (0 1 1)   | 4            | -71.48                                   | 6.05      | 3.87                 |
|         | (1 1 -1)  | 4            | -71.48                                   | 6.05      | 3.86                 |
| Salt 10 | (hkl)     | Multiplicity | $E_{\text{att}}$ (kJ mol <sup>-1</sup> ) | $R_{hkl}$ | $S_{\text{rel}}$ (%) |
|         | (0 0 1)   | 2            | -6.59                                    | 1.00      | 54.50                |
|         | (0 1 1)   | 2            | -11.19                                   | 1.70      | 33.04                |
|         | (1 0 1)   | 2            | -30.13                                   | 4.57      | 6.98                 |
|         | (1 0 0)   | 2            | -31.06                                   | 4.71      | 5.48                 |
| Salt 11 | (hkl)     | Multiplicity | $E_{\text{att}}$ (kJ mol <sup>-1</sup> ) | $R_{hkl}$ | $S_{\text{rel}}$ (%) |
|         | (0 1 0)   | 2            | -20.20                                   | 1.00      | 32.85                |
|         | (0 0 1)   | 2            | -20.53                                   | 1.02      | 30.15                |
|         | (1 0 1)   | 2            | -23.63                                   | 1.17      | 19.37                |
|         | (0 1 -1)  | 2            | -27.57                                   | 1.36      | 3.24                 |
|         | (1 0 0)   | 2            | -31.60                                   | 1.56      | 10.16                |
|         | (1 -1 0)  | 2            | -36.46                                   | 1.80      | 4.24                 |
| Salt 12 | (hkl)     | Multiplicity | $E_{\text{att}}$ (kJ mol <sup>-1</sup> ) | $R_{hkl}$ | $S_{\text{rel}}$ (%) |
|         | (0 2 0)   | 2            | -7.06                                    | 1.00      | 74.70                |
|         | (0 1 1)   | 4            | -61.83                                   | 8.76      | 5.64                 |
|         | (0 2 1)   | 4            | -34.96                                   | 4.95      | 12.93                |
|         | (1 1 0)   | 2            | -44.82                                   | 6.35      | 6.73                 |
| Salt 13 | (hkl)     | Multiplicity | $E_{\text{att}}$ (kJ mol <sup>-1</sup> ) | $R_{hkl}$ | $S_{\text{rel}}$ (%) |
|         | (0 0 2)   | 2            | -33.00                                   | 1.00      | 38.63                |
|         | (1 1 2)   | 4            | -48.88                                   | 1.48      | 9.93                 |
|         | (1 1 1)   | 4            | -50.95                                   | 1.54      | 11.28                |
|         | (1 1 0)   | 4            | -53.03                                   | 1.61      | 34.10                |
|         | (0 2 0)   | 2            | -68.91                                   | 2.09      | 6.06                 |
| Salt 14 | (hkl)     | Multiplicity | $E_{\text{att}}$ (kJ mol <sup>-1</sup> ) | $R_{hkl}$ | $S_{\text{rel}}$ (%) |
|         | (0 0 1)   | 2            | -21.55                                   | 1.00      | 38.45                |
|         | (0 1 -2)  | 2            | -24.11                                   | 1.12      | 16.47                |
|         | (0 1 -1)  | 2            | -27.49                                   | 1.28      | 24.15                |
|         | (1 0 0)   | 2            | -48.24                                   | 2.24      | 15.97                |
|         | (1 0 -1)  | 2            | -54.12                                   | 2.51      | 3.19                 |
|         | (1 -1 1)  | 2            | -54.48                                   | 2.53      | 0.47                 |
|         | (1 -1 0)  | 2            | -60.83                                   | 2.82      | 1.31                 |
| Salt 15 | (hkl)     | Multiplicity | $E_{\text{att}}$ (kJ mol <sup>-1</sup> ) | $R_{hkl}$ | $S_{\text{rel}}$ (%) |
|         | (0 0 1)   | 2            | -21.21                                   | 1.00      | 31.67                |
|         | (1 -1 -1) | 2            | -22.78                                   | 1.07      | 22.83                |
|         | (0 1 0)   | 2            | -27.64                                   | 1.30      | 21.59                |
|         | (0 1 1)   | 2            | -28.23                                   | 1.33      | 4.58                 |
|         | (1 0 0)   | 2            | -30.43                                   | 1.43      | 14.89                |
|         | (1 0 -1)  | 2            | -35.92                                   | 1.69      | 4.44                 |
| Salt 16 | (hkl)     | Multiplicity | $E_{\text{att}}$ (kJ mol <sup>-1</sup> ) | $R_{hkl}$ | $S_{\text{rel}}$ (%) |
|         | (2 0 0)   | 2            | -76.58                                   | 1.00      | 42.55                |
|         | (2 0 -2)  | 2            | -87.87                                   | 1.15      | 33.68                |
|         | (0 0 2)   | 2            | -104.82                                  | 1.37      | 10.52                |
|         | (1 1 1)   | 4            | -296.08                                  | 3.87      | 12.23                |
|         | (1 1 -1)  | 4            | -316.97                                  | 4.14      | 1.02                 |



**Table S3. Continued.**

| Salt 17 | (hkl)    | Multiplicity | $E_{att}$ (kJ mol <sup>-1</sup> ) | $R_{hkl}$ | $S_{rel}$ (%) |
|---------|----------|--------------|-----------------------------------|-----------|---------------|
|         | (0 1 1)  | 4            | -41.43                            | 1.00      | 64.15         |
|         | (0 2 0)  | 2            | -49.94                            | 1.21      | 15.07         |
|         | (1 0 0)  | 2            | -82.07                            | 1.98      | 20.78         |
| Salt 18 | (hkl)    | Multiplicity | $E_{att}$ (kJ mol <sup>-1</sup> ) | $R_{hkl}$ | $S_{rel}$ (%) |
|         | (1 0 -1) | 2            | -13.64                            | 1.00      | 56.36         |
|         | (0 0 2)  | 2            | -33.47                            | 2.45      | 13.86         |
|         | (0 1 1)  | 4            | -36.04                            | 2.64      | 29.78         |
| Salt 19 | (hkl)    | Multiplicity | $E_{att}$ (kJ mol <sup>-1</sup> ) | $R_{hkl}$ | $S_{rel}$ (%) |
|         | (0 0 2)  | 2            | -62.10                            | 1.00      | 30.42         |
|         | (1 0 -1) | 2            | -76.24                            | 1.23      | 22.57         |
|         | (1 0 1)  | 2            | -81.97                            | 1.32      | 15.63         |
|         | (0 1 1)  | 4            | -89.62                            | 1.44      | 31.38         |
| Salt 20 | (hkl)    | Multiplicity | $E_{att}$ (kJ mol <sup>-1</sup> ) | $R_{hkl}$ | $S_{rel}$ (%) |
|         | (0 0 1)  | 2            | -19.02                            | 1.00      | 38.24         |
|         | (1 1 0)  | 2            | -23.54                            | 1.24      | 19.99         |
|         | (1 0 0)  | 2            | -25.14                            | 1.32      | 20.90         |
|         | (1 1 1)  | 2            | -30.27                            | 1.59      | 3.62          |
|         | (1 0 1)  | 2            | -31.87                            | 1.68      | 4.93          |
|         | (0 1 0)  | 2            | -36.38                            | 1.91      | 12.33         |

**Table S4. Decomposition schemes for the studied energetic salts according to the H<sub>2</sub>O–CO<sub>2</sub> arbitrary.**

| Salt | The H <sub>2</sub> O–CO <sub>2</sub> arbitrary equation |
|------|---------------------------------------------------------|
| 1    | $C_2H_8N_{10}O_4 = 2C + 4H_2O + 5N_2$                   |
| 2    | $C_2H_8N_{10}O_2 = C + CH_4 + 2H_2O + 5N_2$             |
| 3    | $2C_2H_{10}N_{12}O_2 = C + 3CH_4 + 4H_2O + 12N_2$       |
| 4    | $C_4H_{12}N_{14}O_2 = 2C + 2CH_4 + 2H_2O + 7N_2$        |
| 5    | $2C_4H_{14}N_{16}O_2 = 3C + 5CH_4 + 4H_2O + 16N_2$      |
| 6    | $2C_3H_{12}N_{14}O_3 = 3C + 3CH_4 + 6H_2O + 14N_2$      |
| 7    | $2C_3H_{10}N_{12}O_4 = 5C + CH_4 + 8H_2O + 12N_2$       |
| 8    | $2C_6H_{14}N_{16}O_6 = 11C + CH_4 + 12H_2O + 16N_2$     |
| 9    | $C_4H_{12}N_{12}O_6 = 4C + 6H_2O + 6N_2$                |
| 10   | $C_4H_8N_{16}O_2 = 3C + CH_4 + 2H_2O + 8N_2$            |
| 11   | $4C_3H_{11}N_{13}O_3 = 7C + 5CH_4 + 12H_2O + 26N_2$     |
| 12   | $4C_3H_{11}N_{13}O_6 = 11C + CO_2 + 22H_2O + 26N_2$     |
| 13   | $4C_3H_5N_{13}O_2 = 11C + CH_4 + 8H_2O + 26N_2$         |
| 14   | $4C_4H_7N_{13}O_2 = 13C + 3CH_4 + 8H_2O + 26N_2$        |
| 15   | $2C_3H_6N_{14}O_2 = 5C + CH_4 + 4H_2O + 14N_2$          |
| 16   | $C_6H_{12}N_{18}O_2 = 4C + 2CH_4 + 2H_2O + 9N_2$        |
| 17   | $C_2H_4N_8O_2 = 2C + 2H_2O + 4N_2$                      |
| 18   | $2C_2H_8N_{10}O_3 = 3C + CH_4 + 6H_2O + 10N_2$          |
| 19   | $C_3H_8N_{12}O_2 = 2C + CH_4 + 2H_2O + 6N_2$            |
| 20   | $C_3H_{10}N_{14}O = C + 2CH_4 + H_2O + 7N_2$            |

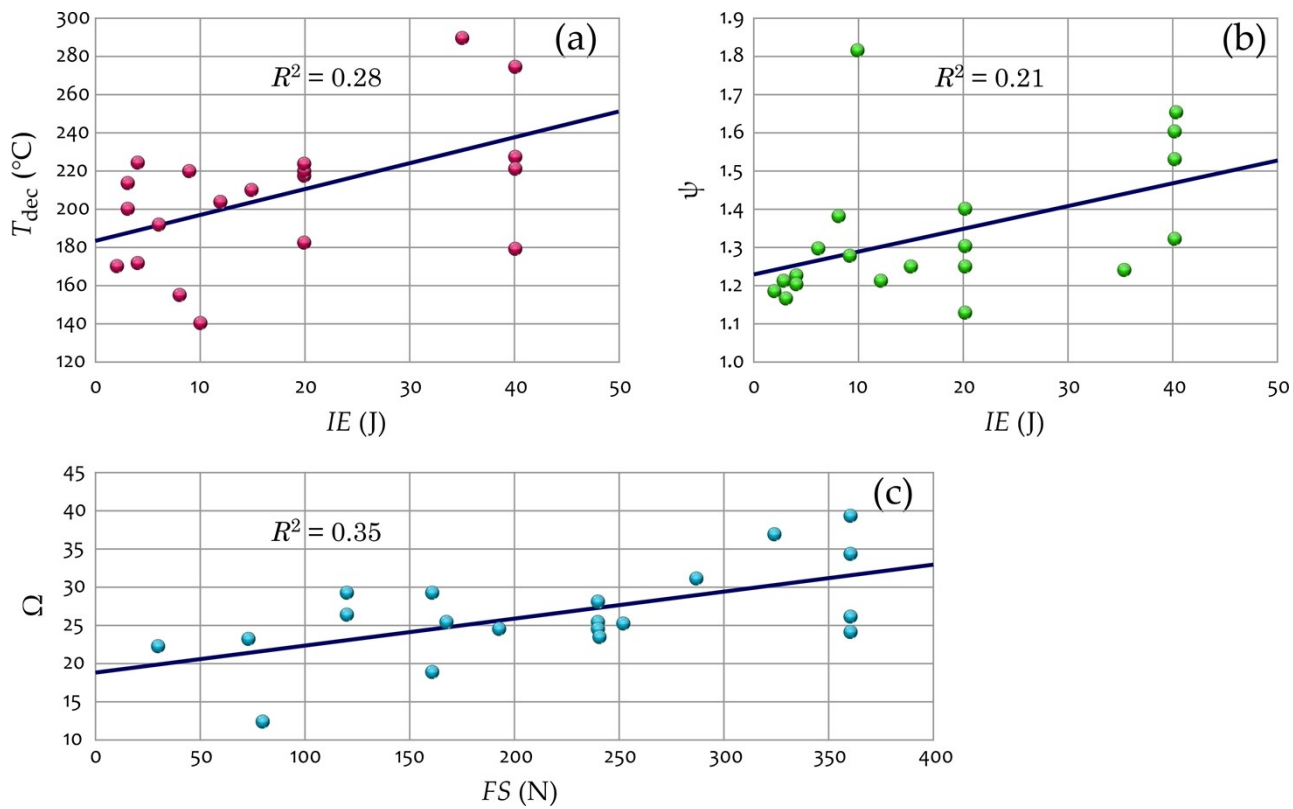

**Fig. S3.** Separate correlation of decomposition temperature (a), crystal habit sphericity (b) with impact sensitivity and function  $\Omega$  with friction sensitivity (c).
